# Supplementary material for: Anti-Inflammatory Mechanisms of Curcumin and Its Metabolites in White Adipose Tissue and Cultured Adipocytes
Source: MDPI journal article supplement (doi:10.3390/nu16010070), 2023-12-25
Supplement: s1 [file s1]

## Anti-Inflammatory Mechanisms of Curcumin in White Adipose Tissue of Diet-Induced Obese Male Mice

Islam et al, Nutrients.

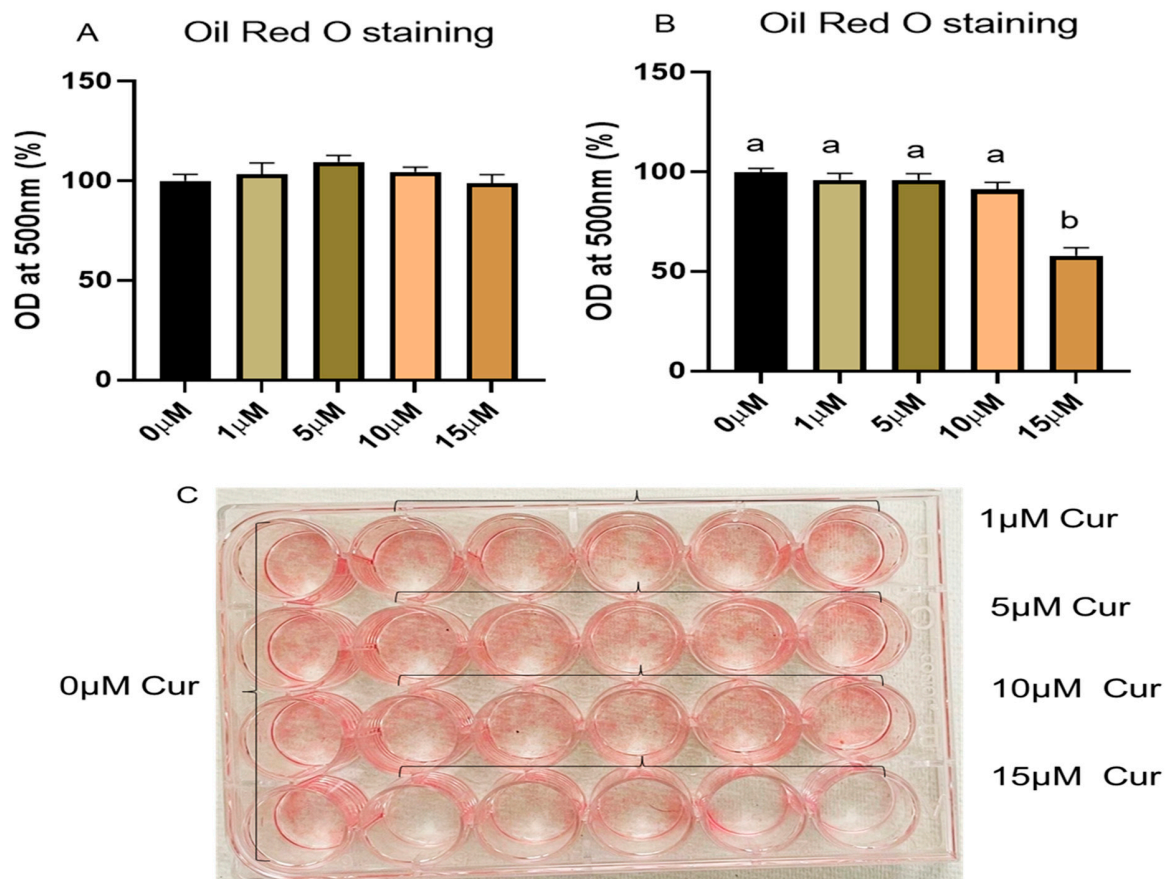

**Supplementary Figure 1.** Effects of curcumin on lipid accumulation in 3T3-L1 adipocytes. Oil red O staining was applied to 3T3-L1 adipocytes treated with different doses of curcumin (0 – 15  $\mu\text{M}$ ): A: post-differentiation; or B, C: during differentiation. Only 15  $\mu\text{M}$  dose treatment during differentiation reduced lipids, which may be in part due to fewer cells according to Figure S1 C. Means without a common letter differ ( $p$ -value $<0.05$ ),  $N = 2$  biological experiments, with 4-5 wells per treatment in each experiment.

## Anti-Inflammatory Mechanisms of Curcumin in White Adipose Tissue of Diet-Induced Obese Male Mice

Islam et al, Nutrients.

RT: 0.00 - 15.01

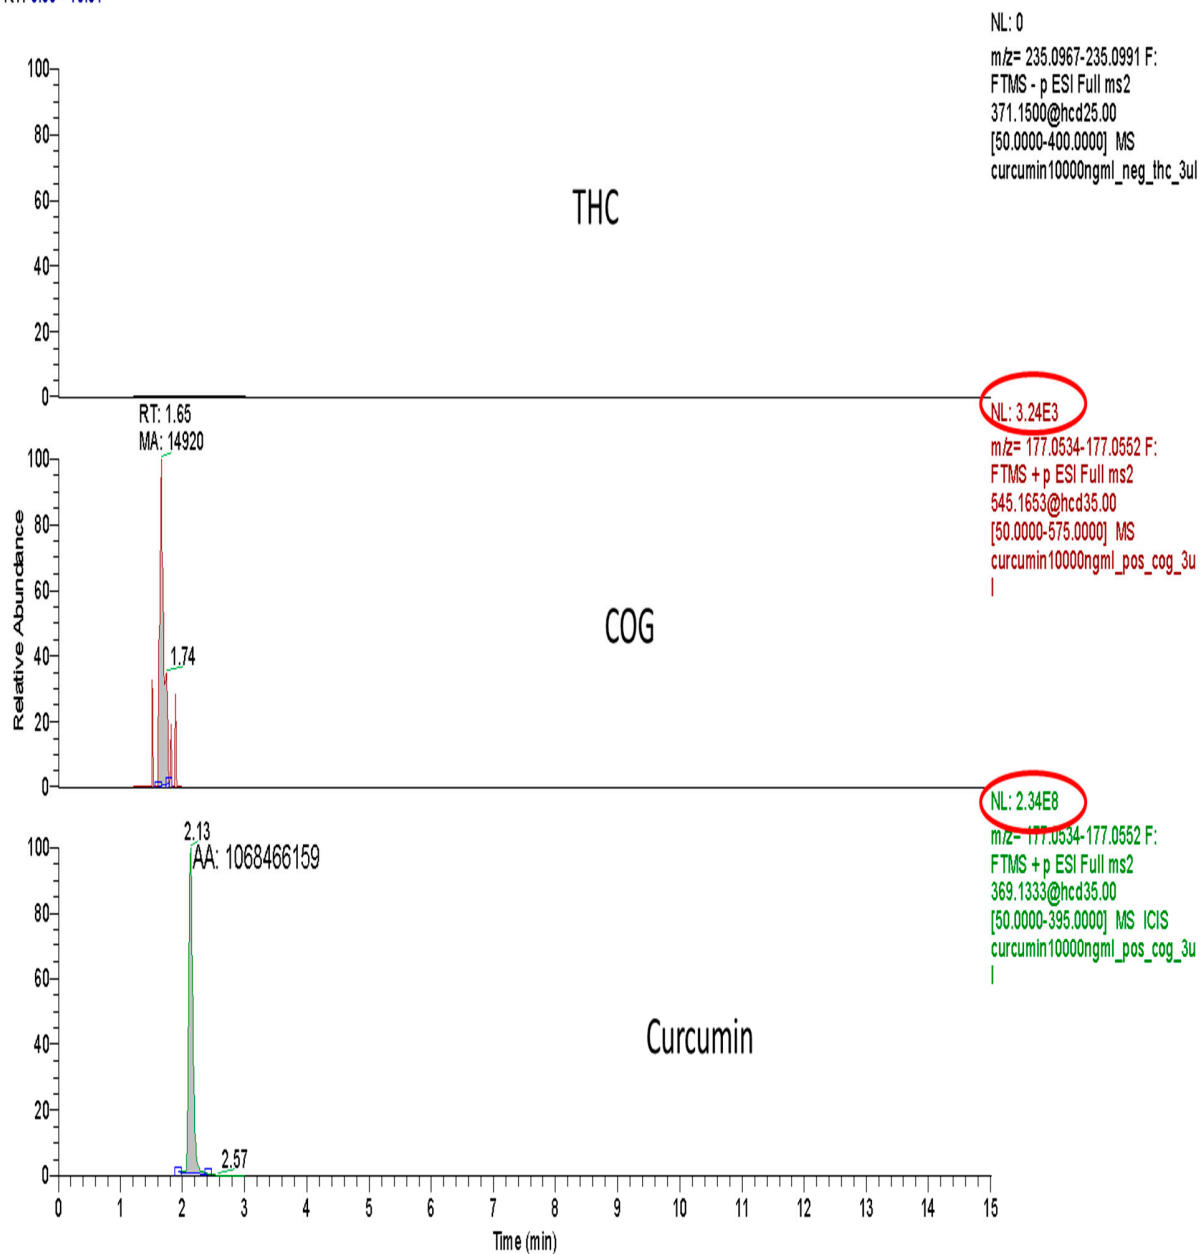

**Supplementary Figure 2.** Extracted ion chromatograms of THC, COG and Curcumin from the sample of curcumin powder, by LC-MS/MS. THC was not detected; COG was detected with a retention time of 1.65 min; Curcumin was detected with a retention time at 2.13 min.

## Anti-Inflammatory Mechanisms of Curcumin in White Adipose Tissue of Diet-Induced Obese Male Mice

Islam et al, Nutrients.

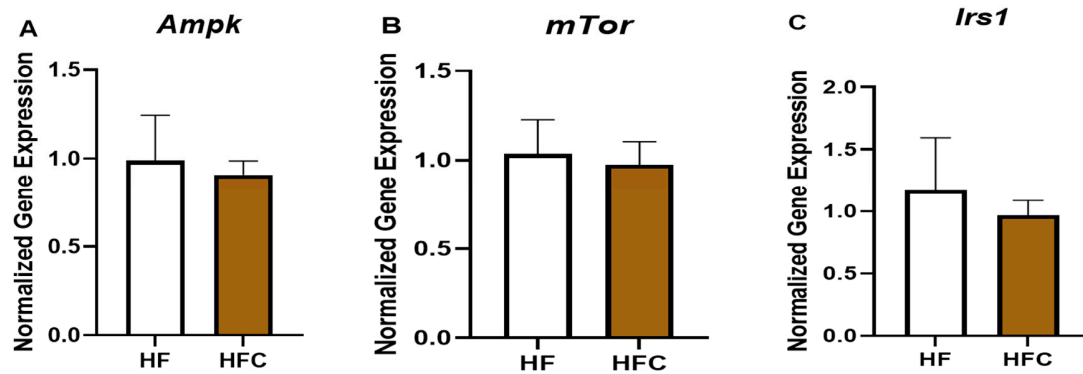

**Supplementary Figure 3.** Curcumin did not influence insulin signaling related gene expression in mice WAT. Insulin signaling-related genes (A) *Ampk* (B) *mTOR* and (C) *Irs1* gene expression were not altered in WAT of HF vs HFC fed mice. Data is presented as  $\pm$  SME ( $N = 6-9$ )
